# Supplementary material
Source: publisher figshare collection journal article supplement (https://acs.figshare.com/ndownloader/files/14298209)
Supplement: Supplementary file 1 [file 14298209]

## Supporting Information

### Enhanced Hydrolytic Stability of Porous Boron Nitride *via* the Control of Crystallinity, Porosity and Chemical Composition

Ravi Shankar<sup>‡</sup>, Sofia Marchesini<sup>‡</sup>, Camille Petit\*

Barrer Centre, Department of Chemical Engineering, Imperial College London, South Kensington Campus, Exhibition Road, London SW7 2AZ, United Kingdom

<sup>‡</sup> These authors contributed equally to the work.

\* Corresponding author:

E-mail: [camille.petit@imperial.ac.uk](mailto:camille.petit@imperial.ac.uk); Phone: +44 (0)20 7594 3182 (Petit C.)

**Table S1.** Key textural parameters derived from N<sub>2</sub> sorption isotherms obtained at -196°C for the various BN samples. From the data, one can observe the extreme sensitivity of porous BN to decomposition in the presence of water/moisture. Further, it is shown that synthesizing porous BN at higher temperatures enhances the hydrolytic stability.

| <b>Sample</b>                               | <b>S<sub>BET</sub> [m<sup>2</sup> g<sup>-1</sup>]</b> | <b>V<sub>tot</sub> [cm<sup>3</sup> g<sup>-1</sup>]</b> | <b>V<sub>micro</sub> [cm<sup>3</sup> g<sup>-1</sup>]</b> | <b>V<sub>micro</sub>/ V<sub>tot</sub> [%]</b> |
|---------------------------------------------|-------------------------------------------------------|--------------------------------------------------------|----------------------------------------------------------|-----------------------------------------------|
| <b>High surface area BN</b>                 |                                                       |                                                        |                                                          |                                               |
| <b>Pure</b>                                 | 1666                                                  | 1.16                                                   | 0.66                                                     | 57.1                                          |
| <b>Acid wash 24 h</b>                       | 52                                                    | 0.022                                                  | 0.021                                                    | 99.1                                          |
| <b>Water wash 24 h</b>                      | 51                                                    | 0.022                                                  | 0.021                                                    | 99.1                                          |
| <b>Acid wash 1 h</b>                        | 21                                                    | 0.012                                                  | 0.008                                                    | 75.2                                          |
| <b>Water wash 1 h</b>                       | 16                                                    | 0.022                                                  | 0.016                                                    | 75.1                                          |
| <b>Humidity 8 h</b>                         | 5                                                     | 0.020                                                  | 0.002                                                    | 10.0                                          |
| <b>Humidity 1 week</b>                      | 10                                                    | 0.020                                                  | 0.010                                                    | 50.0                                          |
| <b>Low surface area BN</b>                  |                                                       |                                                        |                                                          |                                               |
| <b>Pure</b>                                 | 43                                                    | 0.078                                                  | 0.016                                                    | 20.5                                          |
| <b>Acid wash 24 h</b>                       | 389                                                   | 0.296                                                  | 0.147                                                    | 49.7                                          |
| <b>Water wash 24 h</b>                      | 23                                                    | 0.039                                                  | 0.005                                                    | 12.8                                          |
| <b>Acid wash 1 h</b>                        | 100                                                   | 0.141                                                  | 0.040                                                    | 28.4                                          |
| <b>Acid wash 24 h –<br/>Water wash 24 h</b> | 157                                                   | 0.180                                                  | 0.060                                                    | 33.3                                          |
| <b>Water wash 1 week</b>                    | 222                                                   | 0.324                                                  | 0.083                                                    | 25.6                                          |
| <b>High temperature BN</b>                  |                                                       |                                                        |                                                          |                                               |
| <b>Pure</b>                                 | 981                                                   | 1.01                                                   | 0.43                                                     | 0.43                                          |
| <b>Water wash 24 h</b>                      | 311                                                   | 0.44                                                   | 0.12                                                     | 0.27                                          |

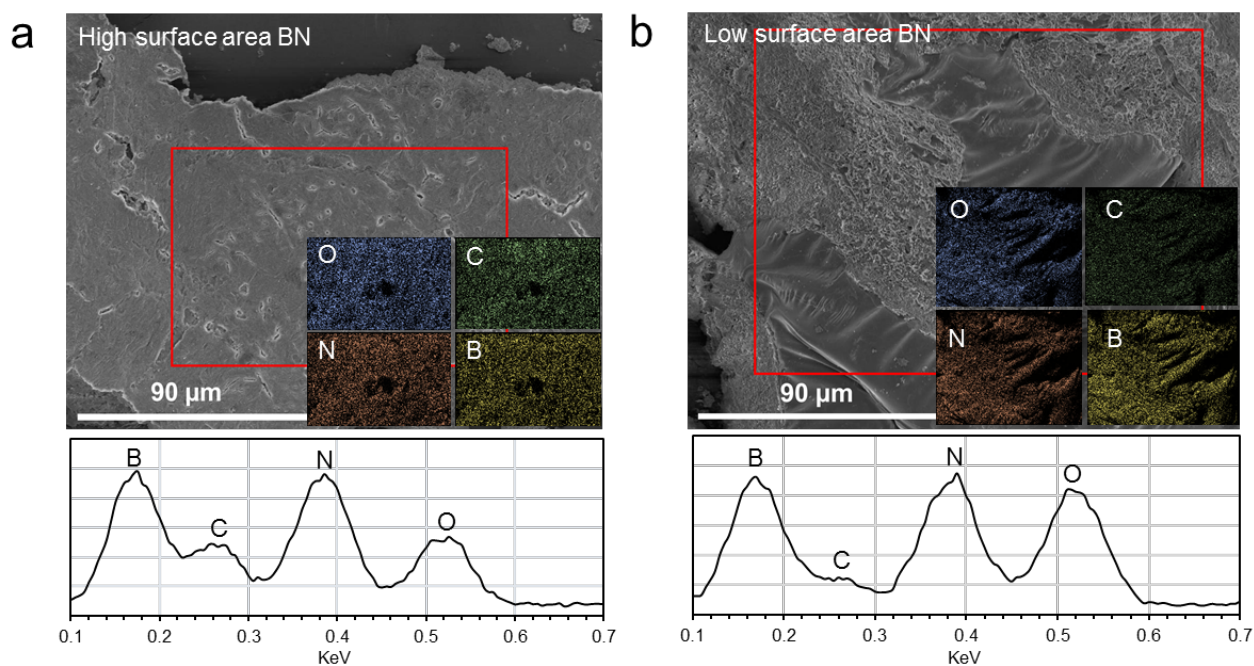

**Figure S1.** (a, b) SEM EDX spectrum of the high and low surface area BN samples with EDX spectra shown.

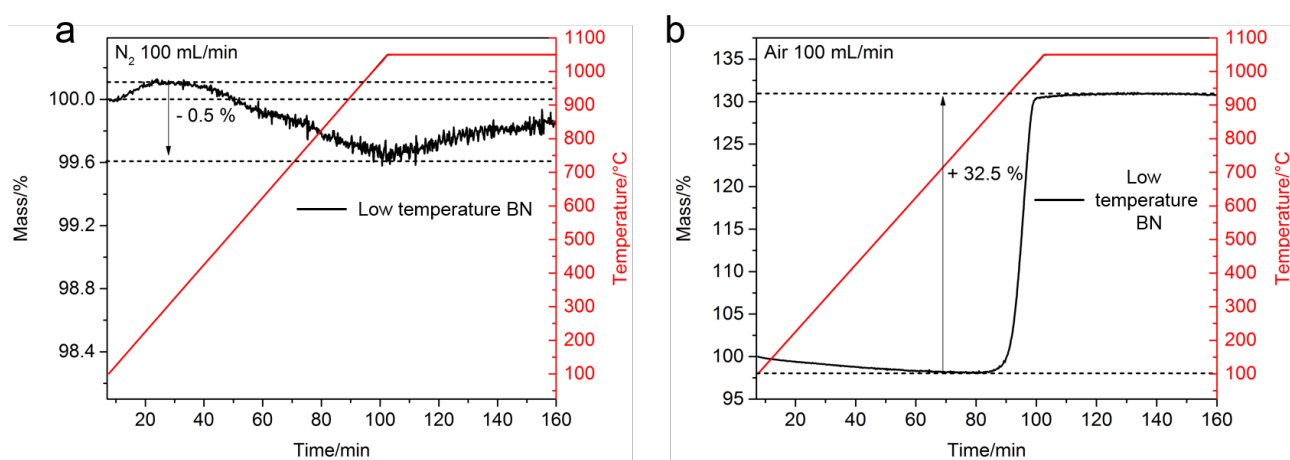

**Figure S2.** Thermogravimetric analysis of the low temperature BN sample under (a) nitrogen flow and (b) air flow.

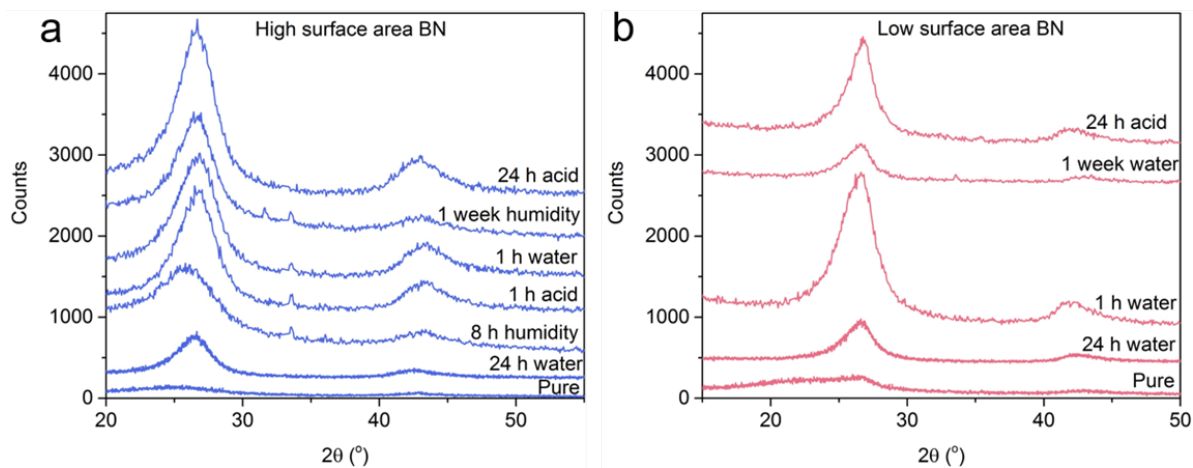

**Figure S3.** (a, b) XRD patterns for high and low surface area BN samples, before and after various degrees of exposure to aqueous solutions, investigated in this study. All of the samples exhibit an amorphous, turbostratic character.

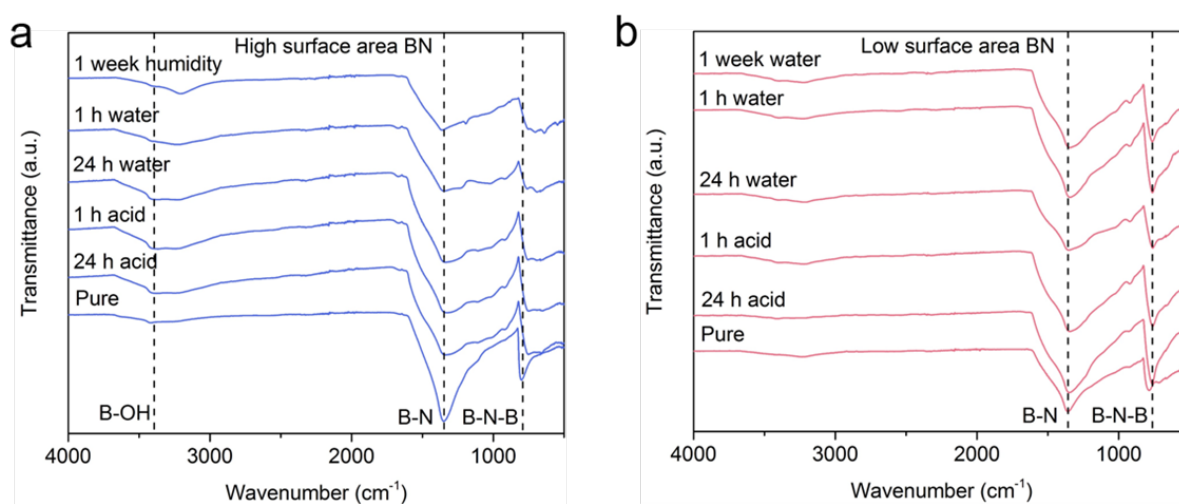

**Figure S4.** (a, b) FT-IR spectra of porous BN samples before and after hydrolysis with the key characteristic bands at  $\sim 1350\text{ cm}^{-1}$  (B-N in-plane stretching),  $\sim 1000\text{ cm}^{-1}$  (B-O bending),  $\sim 800\text{ cm}^{-1}$  (B-N-B out-of-plane bending), and  $\sim 3400\text{ cm}^{-1}$  (B-OH stretching).

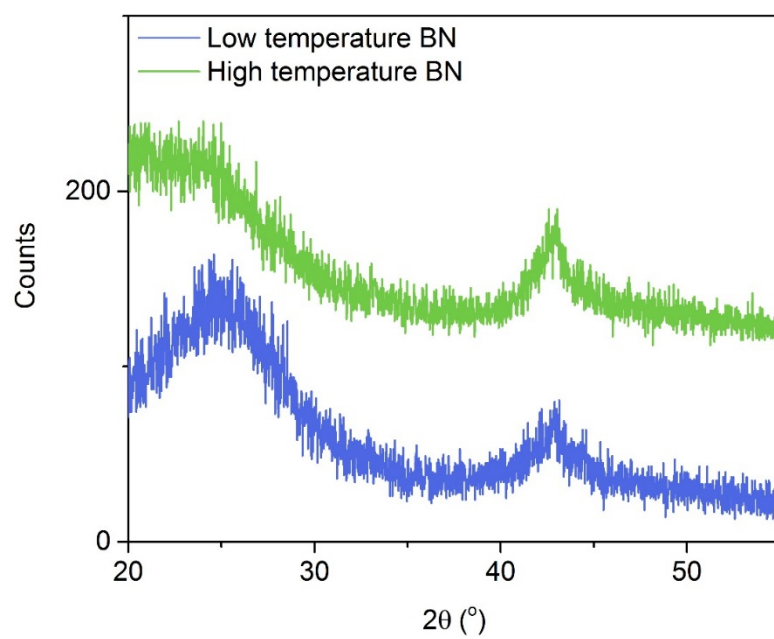

**Figure S5.** XRD patterns for high and low temperature BN samples before water exposure.
